# Supplementary material for: Surface-Pore-Modified N-Doped Amorphous Carbon Nanospheres Tailored with Toluene as Anode Materials for Lithium-Ion Batteries
Source: MDPI journal article supplement (doi:10.3390/nano14090772), 2024-04-28
Supplement: s1 [file s1]

---

## Supporting information

# Surface-Pore-Modified N-Doped Amorphous Carbon Nanospheres Tailored with Toluene as Anode Materials for Lithium-Ion Batteries

Shiran Shan <sup>1</sup>, Chunze Yuan <sup>1,2,\*</sup>, Guangsu Tan <sup>1</sup>, Chao Xu <sup>1</sup>, Lin Li <sup>1,2</sup>, Guoqi Li <sup>1</sup>, Jihao Zhang <sup>1</sup> and Tsu-Chien Weng <sup>1,2,\*</sup>

- <sup>1</sup> School of Physical Science and Technology, ShanghaiTech University, Shanghai 201210, China; shanshr@shanghaitech.edu.cn (S.S.); tangs@shanghaitech.edu.cn (G.T.); xuchao1@shanghaitech.edu.cn (C.X.); lilin1@shanghaitech.edu.cn (L.L.); ligq1@shanghaitech.edu.cn (G.L.); zhangjh5@shanghaitech.edu.cn (J.Z.)  
<sup>2</sup> Center for Transformative Science, ShanghaiTech University, Shanghai 201210, China  
\* Correspondence: yuanchz@shanghaitech.edu.cn (C.Y.); wengzq@shanghaitech.edu.cn (T.-C.W.)

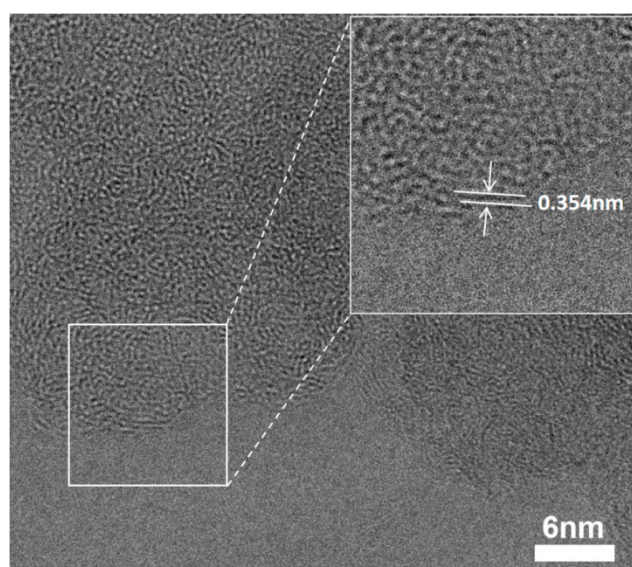

Figure S1. HR-TEM images of ACNs-100.

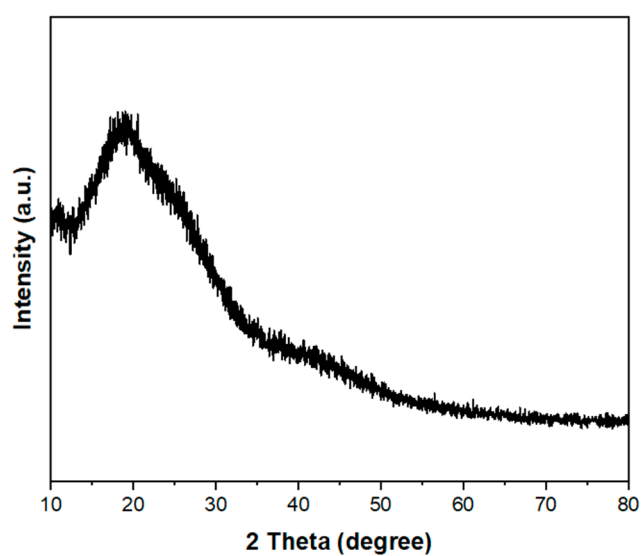

**Figure S2.** XRD pattern of resin nanospheres.

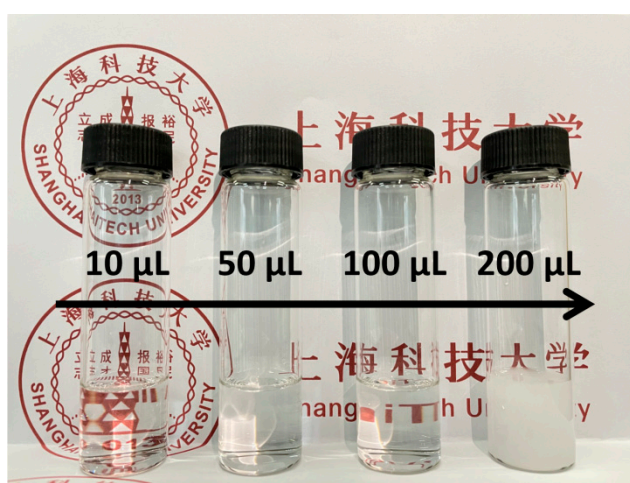

**Figure S3.** Images of the resulting F-127/toluene/TAPB nanoemulsions with the addition of 10 μL, 50 μL, 100 μL, and 200 μL toluene.

**Table S1.** Specific surface areas of ACNs.

| Sample                                            | ACNs-10 | ACNs-50 | ACNs-100 | ACNs-200 |
|---------------------------------------------------|---------|---------|----------|----------|
| $S_{\text{BET}}$ ( $\text{m}^2 \text{g}^{-1}$ )   | 557.9   | 610.7   | 618.8    | 594.5    |
| $V_{\text{MICRO}}$ ( $\text{m}^3 \text{g}^{-1}$ ) | 0.212   | 0.198   | 0.191    | 0.177    |
| $S_{\text{MICRO}}$ ( $\text{m}^2 \text{g}^{-1}$ ) | 526.8   | 482.9   | 462.9    | 426.4    |
| $S_{\text{EX}}$ ( $\text{m}^2 \text{g}^{-1}$ )    | 31.1    | 127.8   | 155.9    | 168.1    |

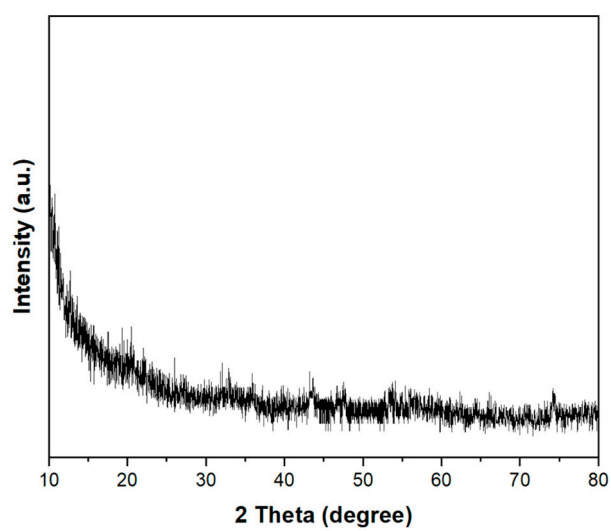

**Figure S4.** XRD pattern of ACNs-100 after cycling.
